# Supplementary material for: Arabidopsis Sucrose Transporter 4 (AtSUC4) is Involved in Root Response of High Content Sucrose-Growth Via IAA- and ABA- Dependent Manner
Source: Research Square preprint supplement (doi:10.21203/rs.3.rs-148254/v1), 2021-01-22
Supplement: Supplementary file 1 [file 544cea5e970c058d180914da.xlsx]

## Sheet: RT-qPCR primer list
Gene name	Primer name	Primer sequences（5'-3'）
AtSWEET11	QAtSWEET11-F	GCCAA TCTCAGTGGTTCGTCAA
	QAtSWEET11-R	GAAGAGGACTGCTTGCCA TGT
AtSWEET12	QAtSWEET12-F	CTCACATCTCCTGAACCAGTAGC
	QAtSWEET12-R	TGCAGCACTGTTTCTAACTCCC
AtSWEET15	QAtSWEET15-F	TATCCTTCCTTGTATTCCTCGC
	QAtSWEET15-R	TCAATGCGTAGTAGAGCCATAG
AtSUC1	QAtSUC1-F	GACGACGACGAGAAGACCTC
	QAtSUC1-R	ATGGGAACCAAGCGATCCAG
AtSUC2	QAtSUC2-F	GTCGCTGGAGCTGGTTTAGT
	QAtSUC2-R	TATCGCTATGGCTCGCGTTT
AtSUC4	QAtSUC4-F	TCTTTGGGTGTGCTAAATTTGG
	QAtSUC4-R	GATAGCTACAATTCCGCCAATG
SnRK2.9	QAT2G23030-SNRK2.9	CAAAGTCTTCTGTTCTGCACTC
	QAT2G23030-SNRK2.9	GACCACACATCAACTGACTTTC
ABI3	QAT3G24650-ABI3-F	CTGTTTCTCACCTTCAACATGG
	QAT3G24650-ABI3-R	ATAGTTTGGAGCAGGCATGTAT
ABI5	QAT2G36270-ABI5-F	AATAAGAGAGGGATAGCGAAC
	QAT2G36270-ABI5-R	GCTACCACCACCTCTATGTATC
PYL1	QAT5G46790-PYL1-F	GTGAGTGAAGATTTCGAGATGC
	QAT5G46790-PYL1-R	CGATCATCGTCCAACAGATCTA
PYL9	QAT1G01360-PYL9-F	GGTATCAAAATCATCGGTGGTG
	QAT1G01360-PYL9-R	GATTCAATCACCATCGTTCCTG
PIN2	QAT5G57090-PIN2-F	ACGGTTACACTAATAGCTACGG
	QAT5G57090-PIN2-R	CTTTCTTCGCCGTCTTCATAAC
PIN4	QAT2G01420-PIN4-F	CGGATTTGTACTCCGTTCAATC
	QAT2G01420-PIN4-R	GTTTAGTTGAAACACCCGTACC
PLT2	QAT1G51190-PLT2-F	TCAAGAGAGTGCACACAATTTG
	QAT1G51190-PLT2-R	GCTGCTACTATTATCGGCACTA
SHR	QAT4G37650-SHR-F	GAGGATGAGGAATAGTGGGTTT
	QAT4G37650-SHR-R	ATCTCCTCAACAAAGCTCTGAC
GUS	QGUS-F	CCCTTACGCTGAAGAGATGC
	QGUS-R	TTGACTGCCTCTTCGCTGTA
ACTIN2	QACTIN2-F	GCTGAGAGATTCAGATGCCCA
	QACTIN2-R	GTGGATTCCAGCAGCTTCCAT
semi-qRT-PCR used for AtSUC4
AtSUC4	SUC4-3-F	AAGCGAGAAATGGCTACTTC
	SUC4-4-R	CAAGATAGCTACAATTCCGC

## Sheet: Identification of mutants
atsuc4 mutants name	Primers name	Primer sequences（5'-3'）
suc4-1
	suc4-1-F	GCTCGTTGGGCATAGTAGCGATAGG
	suc4-1-R	AGAAGGCAGACTTGAGATTGGCACA
er105（ERACTA)	ERg2248-F	AAGAAGTCATCTAAAGATGTGA
	ER-105rc-R	AGCTGACTATACCCGATACTGA
	ERg2248-F	AAGAAGTCATCTAAAGATGTGA
	ERg3016r-R	AGAATTTTCAGGTTTGGAATCTGT
suc4-2
CRISPR/Cas9 construction
	SUC4-U3b-gRT1	GGTTGCGAGTGACTCTGTGAGTTTTAGAGCTAGAAAT
	SUC4-AtU3bT1	TCACAGAGTCACTCGCAACCTGACCAATGTTGCTCC
	SUC4-U6-29-gRT1	GTTGCGAGTGACTCTGTGAGTTTTAGAGCTAGAAAT
	SUC4-AtU6-29T1	TCACAGAGTCACTCGCAACCAATCTCTTAGTCGACT
	SUC4-U6-1-gRT2	TCGCTACTATGCCCAACGAGGTTTTAGAGCTAGAAAT
	SUC4-AtU6-1T2	CTCGTTGGGCATAGTAGCGACAATCACTACTTCGTCT
	SUC4-U3d-gRT2	TCGCTACTATGCCCAACGAGGTTTTAGAGCTAGAAAT
	SUC4-AtU3dT2	CTCGTTGGGCATAGTAGCGATGACCAATGGTGCTTTG
	PB-F	GCGCGCGGTCTCGCTCGACTAGTATGG
	PB-R	GCGCGCGGTCTCTACCGACGCGTATCC
	U-F	CTCCGTTTTACCTGTGGAATCG
	gR-R	CGGAGGAAAATTCCATCCAC
	Pps-GGL	TTCAGAGGTCTCTCTCGACTAGTATGGAATCGGCAGCAAAGG
	1-Pgs-GG2	AGCGTGGGTCTCGTCAGGGTCCATCCACTCCAAGCTC
	2-Pps-GG2	TTCAGAGGTCTCTCTGACACTGGAATCGGCAGCAAAGG
	2-Pgs-GG3	AGCGTGGGTCTCGTCTTCACTCCATCCACTCCAAGCTC
	3-Pps-GG3	TTCAGAGGTCTCTAAGACTTTGGAATCGGCAGCAAAGG
	3-Pgs-GG4	AGCGTGTGGTCTCGAGTCCTTCCATCCACTCCAAGCTC
	4-Pps-GG4	TTCAGAGGTCTCTGACTACATGGAATCGGCAGCAAAGG
	Pgs-GGR	AGCGTGGGTCTCGACCGACGCGTATCCATCCACTCCAAGCTC
	CX-SUC4-F	TATACCCTCTTTTAACGTGCCC
	CX-SUC4-R	GCAGACTTGAGATTGGCACA
suc4-3
	AtSUC4g2609r-F	TTCCATCTCCTTGCCATTTC
	WiscLB_p745-R	AACGTCCGCAATGTGTTATTAAGTTGT

## Sheet: Sublocalization and GUS primers
Vector name	Primers name	Primer sequences（5'-3'）
pCAMBIA1300-pSUC4-gSUC4-GFP	AtSUC4-Start-F	TATGACCATGATTACGAATTCGCGACCATCTTTTCTTCTT
	AtSUC4-Stop-R	TGTCGACTCTAGAGGATCCTGGGAGAGGGATGGGCTTCT
pCAMBIA1301-pSUC4::cSUC4-Citrine	pCAM-35S-ATSUC4-F	TCAGATCTCGAGCTCAAGCTTATGGCTACTTCCGATCAAGATCG
	pCAM-35S-ATSUC4-R	TTATCTAGATCCGGTGGATCCTCATGGGAGAGGGATGGGC
pEarley101-35S::cAtSUC4-GFP	pEarly101-AtSUC4-F	CATAGTCGACATGGCTACTTCCGATCAAG
	pEarly101-AtSUC4-R	CGGGGTACCTGGGAGAGGGATGGGCTTC
pAtSUC4::GUS	pDONR207-pATSUC4-F	GGGGACAACTTTGTACAAAAAGCAGGCTTCTAATTGAACGCAAAAAATAGTCC
	pDONR207-pATSUC4-R	GGGGACAACTTTGTACAAGAAAGCTGGGTGCTCGCTTCACAGTCGTCG
	pHGWFS.7-pATSUC4-F	ACATGATTCGAGTGAGCAAC
	pHGWFS.7-pATSUC4-R	CATTTTCTGTTGGATCACGG
